# Supplementary material for: Estrogen receptor modulators genistein, daidzein and ERB-041 inhibit cell migration, invasion, proliferation and sphere formation via modulation of FAK and PI3K/AKT signaling in ovarian cancer
Source: Springer Nature journal article supplement (doi:10.1186/s12935-018-0559-2), 2018-05-01

**Figure S1.** Transient silencing of ER $\alpha$  did not show significant change in ovarian cancer cell migration and invasion. (A) Transient knockdown of ER $\alpha$  (siER $\alpha$ ) mRNA expression in SKOV-3 cells by qPCR. (B) *In vitro* migration and invasion assays in SKOV-3 cells transiently transfected with siRNA specifically targeting ER $\alpha$  and control siRNA. Upper panel: representative images of migrating or invading cells. Lower panel: cell migration or invasion presented as percentage of control; n=3; \*\*, p<0.005.

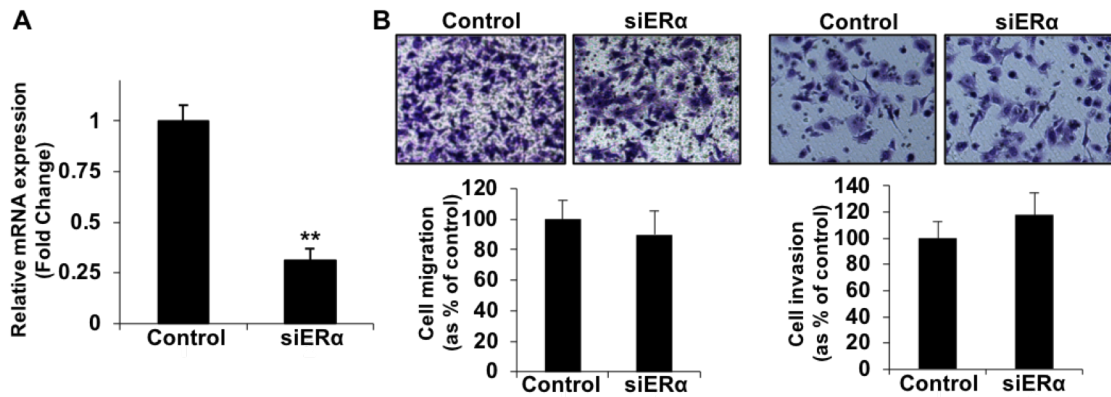

Supplement: MOESM1 [file 15731154]
